# Supplementary material for: GBA variants influence cognitive status in amyotrophic lateral sclerosis
Source: PubMed Central journal article supplement — J Neurol Neurosurg Psychiatry. 2021 Sep 28;93(4):453–5. doi: 10.1136/jnnp-2021-327426 (PMC8921570; doi:10.1136/jnnp-2021-327426), 2021-09-28
Supplement: jnnp-2021-327426supp001.pdf [file jnnp-2021-327426supp001.pdf]

## Supplementary Methods

### *Subjects*

The study population consisted of incident patients identified through the Piemonte and Valle d'Aosta Register for ALS (PARALS), diagnosed with definite, probable, and probable laboratory-supported ALS according to the El Escorial revised diagnostic criteria<sup>1</sup> between January 1<sup>st</sup> 2007 and December 31<sup>st</sup> 2015. The PARALS is a prospective epidemiologic registry established in 1995 in Piemonte and Valle d'Aosta regions in Northern Italy.<sup>2</sup> Patients were followed at the ALS Centers in Turin and Novara. Patients with a history of other neurologic disorders affecting cognition (neurodegenerative diseases other than FTD, major stroke, severe head injuries, mental retardation), alcohol and drug dependence, severe mental illness, and use of high-dose psychoactive medications were excluded from the analysis.<sup>3</sup> Non-Italian speaking incident patients were also excluded. None of the study participants showed oxygen saturation <92% based on pulse oximetry at the time of their neuropsychological assessment. Six hundred seventy-seven healthy controls, matched by age, sex, and ancestry (based on the origin of both parents), were recruited from the patients' general practitioners. Out of 1313 incident cases in the period 2007-2015, 751 ALS patients from the participant ALS Centers (57.2%) underwent whole-genome sequencing and full neuropsychological assessment.

### *Neuropsychological evaluation*

An extensive list of neuropsychological tests was performed on each patient.<sup>4</sup> These included: Mini-Mental State Examination (MMSE); Letter and category fluency tests; Frontal Assessment

Battery (FAB); Digit Span Forward and Backward; Trail-Making Test (TMT) A and B; Rey Auditory Verbal Learning Test (RAVLT), immediate and delayed recall; Babcock Story Recall Test (BSRT), immediate and delayed recall; Rey-Osterrieth Complex Figure (ROCF), copy and delayed recall; and Raven's Colored Progressive Matrices (CPM47). Neurobehavioral dysfunction was determined by patient history, direct observation by the neuropsychologist, and the family form of the Frontal Systems Behavior Scale completed by a close relative or caregiver. The Edinburgh Cognitive and Behavioral ALS Screen (ECAS) was not included in the battery since the Italian validation was published in 2018.<sup>5</sup> Anxiety and depression were assessed using the Hospital Anxiety and Depression Scale (HADS); the item "I feel slowed down" was discussed with patients in order to have them not to refer to physical disability.<sup>3</sup> The raw data of the neuropsychological tests were adjusted for age and years of education according to the Italian normative. The battery was administered following the same sequence to avoid differential interference. All study participants were tested at diagnosis or during the first follow-up visit (2 months later).

### *Cognitive categorization*

Patients' cognitive status was classified according to the revised ALS-FTD Consensus Criteria<sup>6</sup> into five categories:

1. ALS with normal cognition (ALS-CN);
2. ALS with behavioral impairment (ALSbi);
3. ALS with cognitive impairment (ALSci);
4. ALS with cognitive and behavioral impairment (ALScbi)

### 5. ALS with FTD (ALS-FTD).

Patients were retrospectively classified blindly by two neuropsychologists with expertise in ALS (BI, LP). The concordance rate was over 90% for all diagnoses. When there was disagreement, the case was discussed until a consensus diagnosis was established.<sup>4</sup> In the analyses the ALSbi, ALSci and ALScbi group were collapsed into a single group, i.e. intermediate cognitive phenotype.

#### *Whole-genome sequencing*

All eligible patients and healthy subjects were screened for *GBA* variants through whole-genome sequencing (WGS). Blood samples and genomic DNA have been processed according to standard protocols: library preparation and read sequencing have been performed as per manufacturer protocol; read alignment, variant calling and quality control have been performed according to standard protocols. WGS methods have been fully described elsewhere<sup>7</sup>.

Annotation was performed with KGGseq v1.0 (pgmlab.top/kggseq). A repeat-primed PCR determined the presence of the *C9orf72* hexanucleotide expansion. A threshold of  $\geq 30$  repeats with the typical sawtooth pattern was considered pathological.<sup>8</sup>

#### *Statistical Analysis*

Descriptive statistics were calculated for baseline demographics and cognitive testing. Survival was calculated from onset to death or censoring date (December 31<sup>st</sup>, 2019) using the Kaplan-Meier method. Patients with tracheostomy were coded as deceased on the date of the procedure.

Comparisons were performed using the log-rank test. In the first step of the analyses, only variants known to be a risk factor for cognitive decline in PD were considered. A single-variant association test was used to compare the frequency of *GBA* variants between ALS cases and healthy subjects.<sup>9</sup> A binomial test was used to assess the prevalence of *GBA* mutations across cognitive groups. Given the strong influence of *C9orf72* on cognitive status, we performed the binomial test with and without *C9orf72* expansion carriers to rule out its impact on the results. Linear mixed-effects models were used to test for associations between *GBA* genotype and cognitive functioning. The covariates included in this model were age at onset, sex, site of onset (classified as bulbar or spinal), the presence of bulbar signs at diagnosis, the rate of ALS Functional Rating Scale-Revised (ALS-FRS-R) decline at the time of diagnosis, and *C9orf72* status. ALS-FRS-R decline was calculated as follows:  $(48 - \text{ALS-FRS-R at diagnosis}) / \text{months from disease onset to diagnosis}$ . All statistical analyses were performed in R v.3.6.0 (<http://www.r-project.org>). R scripts are available on GitHub (<http://github.com>). To assess whether pathogenic rare variants in *GBA* contribute to cognitive decline risk in ALS, a gene-based rare variants association test was also performed. This analysis provided an independent approach from the assumption that only *GBA* variants associated with PD may influence cognitive status. Only rare variants were included, and minor allele frequency threshold was set at < 5%. The analysis was performed confronting ALS patients with cognitive decline (i.e. ALS-FTD and ALSCi/Cbi/Bi) vs ALS patients with normal cognitive function. The rare variant burden was assessed using the Sequence Kernel Association Test (SKAT) and the Sequence Kernel Association Test - Optimized (SKAT-O) as implemented in RVtests (<http://zhanxw.github.io/rvtests/>).



## Supplementary Tables

**Supplementary Table 1.** Genes and Risk Factors associated with Parkinson Disease (PD), Dementia with Lewy Bodies (DLB), frontotemporal dementia (FTD) and Amyotrophic Lateral Sclerosis (ALS) that have been implicated in Lysosomal function.

| Gene           | Disease             | Functions involving lysosomes                                                      |
|----------------|---------------------|------------------------------------------------------------------------------------|
| <i>SNCA</i>    | Early-onset PD, DLB | Recruitment of proteins to lysosomal damage sites                                  |
| <i>PARK2</i>   | Early-onset PD      | Mitophagy                                                                          |
| <i>PINK1</i>   | Early-onset PD      | Mitophagy                                                                          |
| <i>LRRK2</i>   | Late-onset PD       | Regulation of lysosomal pH and homeostasis, and lysosome-Golgi trafficking         |
| <i>GBA</i>     | Late-onset PD, DLB  | Accumulation of cholesterol in lysosomes                                           |
| <i>VPS35</i>   | Late-onset PD       | Endosome-Golgi trafficking; autophagy                                              |
| <i>C9ORF72</i> | ALS/FTD             | Autophagy induction and stress granule autophagy                                   |
| <i>GRN</i>     | FTD                 | Regulation of lysosomal pH                                                         |
| <i>TBK1</i>    | ALS/FTD             | Clearance of damaged mitochondria, recruitment to lysosomes by $\alpha$ -synuclein |

---

|                |         |                                                                                    |
|----------------|---------|------------------------------------------------------------------------------------|
| <i>OPTN</i>    | ALS/FTD | Clearance of damaged mitochondria, recruitment to lysosomes by $\alpha$ -synuclein |
| <i>CHMP2B</i>  | ALS/FTD | Regulation of lysosomal trafficking                                                |
| <i>CHCHD2</i>  | PD      | Mitochondrial quality control                                                      |
| <i>CHCHD10</i> | ALS/FTD | Mitochondrial quality control                                                      |
| <i>VCP</i>     | ALS/FTD | Autophagosome maturation and clearance of damaged lysosomes                        |
| <i>SQSTM1</i>  | ALS/FTD | It targets protein aggregates for lysosomal degradation                            |

**Supplementary Table 2.** Results from the gene-based rare variant association test

| <b>Burden test</b> | <b>FTD</b> | <b>ALS-Bi / ALS-Ci / ALS-Cbi</b> |
|--------------------|------------|----------------------------------|
| <b>SKAT</b>        | 0.196      | 0.0125                           |
| <b>SKAT-O</b>      | 0.184      | 0.00005                          |

**Supplementary Table 3.** List of *GBA* variants detected in our ALS series. We identified three common *GBA* polymorphisms (p.E365K, p.T408M, p.N409S), which are known risk factors for DLB and cognitive impairment in PD<sup>10-13</sup>. Six of the other variants have not been reported to be associated with PD.

| Nucleotide | AA      | Exon | SNP id      | gnomAD   | CADD  | ClinVar        | Disease                       |
|------------|---------|------|-------------|----------|-------|----------------|-------------------------------|
|            |         |      |             | NFE      | score |                |                               |
| c.C1319T   | p.P440L | 10   | rs74598136  | .        | 26.2  | Pathogenic     | Gaucher's disease             |
| c.G1279A   | p.E427K | 10   | rs149171124 | 0.0003   | 23.2  | .              | .                             |
| c.A1226G   | p.N409S | 10   | rs76763715  | 0.002    | 22.7  | Pathogenic     | Gaucher's disease, PD,<br>DLB |
| c.C1223T   | p.T408M | 9    | rs75548401  | 0.0091   | 22.2  | Likely benign  | PD                            |
| c.G1093A   | p.E365K | 9    | rs2230288   | 0.0121   | 17.33 | Pathogenic     | PD                            |
| c.A928G    | p.S310G | 8    | rs1057942   | 0        | 14.81 | .              | .                             |
| c.C740G    | p.T247S | 7    | .           | .        | 22    | .              | .                             |
| c.T634A    | p.S212T | 7    | rs398123533 | .        | 1.937 | VUS            |                               |
| c.G626A    | p.R209H | 7    | rs749416070 | 3.92E-05 | 17.53 | . <sup>§</sup> | Reported in PD <sup>14</sup>  |
| c.A38G     | p.K13R  | 3    | rs150466109 | 0.0002   | 0.003 | Benign         |                               |

AA: amino acid; SNP: Single Nucleotide Polymorphism; gnomAD NFE: exome frequency in Non-Finnish European.

§ Classified as likely pathogenic according to the following American College of Medical Genetic (ACMG) criteria<sup>15</sup>: PM1 moderate (Hot-spot of length 17 amino-acids has 7 non-VUS missense/in-frame variants, 6 pathogenic and 1 benign), PM2 moderate (GnomAD exomes homozygous allele count = 0 is less than 3 for recessive gene GBA), PM5 moderate (Alternative variants Arg209Pro and Arg209Cys are classified as Pathogenic), PP2 supporting (269 out of 282 non-VUS missense variants in *GBA* gene are pathogenic).

**Supplementary Table 4.** Comparison of *GBA* risk variants frequency between ALS patients and healthy controls. These variants were found in 18 ALS patients (2.40% of our cohort) and 15 healthy controls (2.22%). The variant frequencies observed in our Italian population are consistent with those reported in gnomAD. The single-variant analysis confirmed that *GBA* variants are not a risk factor for developing ALS. We did not observe homozygote cases or compound heterozygous cases for *GBA* variants. Furthermore, we did not observe mutations in ALS-related genes (*SOD1*, *TARDBP* and *FUS*) in *GBA* risk variants carriers. We identified one patient who carried both a *GBA* risk variant (p.N409S) and the *C9orf72* repeat expansion.

| <i>GBA</i> variant  | n. Heterozygous<br>ALS cases (n=751) | n. Heterozygous<br>HC (n=677) | p-value | gnomAD<br>NFE |
|---------------------|--------------------------------------|-------------------------------|---------|---------------|
| c.1093G>A (p.E365K) | 3                                    | 5                             | 0.49    | 0.0121        |
| c.1223C>T (p.T408M) | 8                                    | 6                             | 0.61    | 0.0091        |
| c.1226A>G (p.N409S) | 7                                    | 4                             | 0.76    | 0.002         |

**Supplementary Table 5.** Clinical and demographic characteristics of ALS patients grouped by *GBA* genotype. The *GBA* risk variants did not influence survival or the motor phenotype. Only two of the ALS patients carrying a *GBA* risk variant exhibited extrapyramidal signs. Both patients had slowly progressive disease, and they developed extrapyramidal signs years after the initial ALS diagnosis. None of the *GBA* risk variants carriers had a family history of Parkinson's disease or other neurodegenerative diseases. The effect of *GBA* mutations on cognitive but not motor phenotype could be explained by a lower susceptibility of motor neurons: it should be noted that while extrapyramidal involvement is established in *GBA* homozygous carriers, motor neuron involvement has only been recently reported in few cases with Gaucher's Disease and one subject with a heterozygous *GBA* mutation.<sup>16,17</sup>

|                                       | <b><i>GBA</i> carriers<br/>(n=18)</b> | <b><i>GBA</i> non carriers<br/>(n=733)</b> | <b>P</b> |
|---------------------------------------|---------------------------------------|--------------------------------------------|----------|
| N (% male)                            | 5 (27.8%)                             | 404 (55.1%)                                | 0.04     |
| Age onset (yrs, SD)                   | 65.2 (10.5)                           | 65.7 (9.9)                                 | 0.84     |
| Bulbar onset, n (%)                   | 4 (22.2%)                             | 244 (33.3%)                                | 0.46     |
| Bulbar signs at diagnosis, n (%)      | 9 (50.0%)                             | 369 (49.2%)                                | 1        |
| <i>C9orf72</i> expansion carriers (%) | 1 (5.6%)                              | 66 (9.0%)                                  | 0.93     |
| Median survival (years, SD)           | 2.65 (1.68-5.26)                      | 3.26 (1.68-5.89)                           | 0.43*    |
| Mean ALSFRS-R slope                   | 1.31 (1.21)                           | 0.99 (1.74)                                | 0.33     |

\* Survival was calculated with Kaplan-Meier curves and significance with Log-rank test

**Supplementary Table 6.** Cognitive phenotypes of *GBA* risk variant carriers. Due to the relatively small number of *GBA* variant carriers, we could not properly draw any conclusion on whether *GBA* variants were predominantly associated with cognitive or behavioural impairment or with a distinct pattern of cognitive deficits. However, it should be noted that the only variant causing Gaucher's Disease of this group (p.N409S) was associated with cognitive impairment in 7 out of the 8 carriers (87.5%): it could be postulated that more disruptive variants have a larger influence on cognitive function. Longitudinal neuropsychological studies and the application of neuroimaging techniques might allow further clarification on this issue. As recently reported in cross-sectional study using  $^{18}\text{F}$ -2-fluoro-2-deoxy-D-glucose-PET,<sup>18</sup> the extent of metabolic brain changes in ALS patients reflects the degree of cognitive impairment, paralleling brain metabolic alterations observed in FTD over time.<sup>19</sup>

| <i>GBA</i> variant  | FTD            | ALSBi | ALSCi | ALSCbi | CN |
|---------------------|----------------|-------|-------|--------|----|
| c.626G>A (p.R209H)  | 0              | 0     | 1     | 0      | 0  |
| c.1093G>A (p.E365K) | 0              | 2     | 0     | 0      | 1  |
| c.1223C>T (p.T408M) | 3              | 0     | 2     | 0      | 3  |
| c.1226A>G (p.N409S) | 2 <sup>§</sup> | 1     | 2     | 1      | 1  |

§ One subject carrying the p.N409S variant and presenting FTD also carried the *C9orf72* repeat expansion

### References to Supplementary materials

1. Brooks BR, Miller RG, Swash M, Munsat TL. El Escorial revisited: Revised criteria for the diagnosis of amyotrophic lateral sclerosis. *Amyotrophic Lateral Sclerosis and Other Motor Neuron Disorders*. 2000;1(5). doi:10.1080/146608200300079536
2. Chiò A, Mora G, Moglia C, et al. Secular Trends of Amyotrophic Lateral Sclerosis. *JAMA Neurology*. 2017;74(9). doi:10.1001/jamaneurol.2017.1387
3. Montuschi A, Iazzolino B, Calvo A, et al. Cognitive correlates in amyotrophic lateral sclerosis: a population-based study in Italy. *Journal of Neurology, Neurosurgery & Psychiatry*. 2015;86(2):168-173. doi:10.1136/jnnp-2013-307223
4. Iazzolino B, Pain D, Peotta L, et al. Validation of the revised classification of cognitive and behavioural impairment in ALS. *J Neurol Neurosurg Psychiatry*. 2019;90(7):734-739. doi:10.1136/jnnp-2018-319696
5. Poletti B, Solca F, Carelli L, et al. Cognitive-behavioral longitudinal assessment in ALS: the Italian Edinburgh Cognitive and Behavioral ALS screen (ECAS). *Amyotrophic Lateral Sclerosis and Frontotemporal Degeneration*. 2018;19(5-6):387-395. doi:10.1080/21678421.2018.1473443
6. Strong MJ, Abrahams S, Goldstein LH, et al. Amyotrophic lateral sclerosis - frontotemporal spectrum disorder (ALS-FTSD): Revised diagnostic criteria. *Amyotrophic Lateral Sclerosis and Frontotemporal Degeneration*. 2017;18(3-4). doi:10.1080/21678421.2016.1267768

7. Grassano M, Calvo A, Moglia C, et al. Mutational analysis of known ALS genes in an Italian population-based cohort. *Neurology*. Published online November 2020.  
doi:10.1212/WNL.0000000000011209
8. Renton AE, Majounie E, Waite A, et al. A Hexanucleotide Repeat Expansion in C9ORF72 Is the Cause of Chromosome 9p21-Linked ALS-FTD. *Neuron*. 2011;72(2).  
doi:10.1016/j.neuron.2011.09.010
9. Lee S, Abecasis GR, Boehnke M, Lin X. Rare-Variant Association Analysis: Study Designs and Statistical Tests. *The American Journal of Human Genetics*. 2014;95(1):5-23.  
doi:10.1016/j.ajhg.2014.06.009
10. Mata IF, Leverenz JB, Weintraub D, et al. *GBA* Variants are associated with a distinct pattern of cognitive deficits in Parkinson's disease: Cognitive Profile in *GBA* -Related PD. *Mov Disord*. 2016;31(1):95-102. doi:10.1002/mds.26359
11. Greuel A, Trezzi J, Glaab E, et al. *GBA* Variants in Parkinson's Disease: Clinical, Metabolomic, and Multimodal Neuroimaging Phenotypes. *Mov Disord*. 2020;35(12):2201-2210. doi:10.1002/mds.28225
12. Davis MY, Johnson CO, Leverenz JB, et al. Association of *GBA* Mutations and the E326K Polymorphism With Motor and Cognitive Progression in Parkinson Disease. *JAMA Neurol*. 2016;73(10):1217. doi:10.1001/jamaneurol.2016.2245
13. Cilia R, Tunesi S, Marotta G, et al. Survival and dementia in *GBA* -associated Parkinson's disease: The mutation matters. *Ann Neurol*. 2016;80(5):662-673. doi:10.1002/ana.24777

14. Heijer JM, Cullen VC, Quadri M, et al. A LARGE-SCALE Full *GBA1* Gene Screening in Parkinson's Disease in the Netherlands. *Mov Disord.* 2020;35(9):1667-1674.  
doi:10.1002/mds.28112
15. Richards S, Aziz N, Bale S, et al. Standards and guidelines for the interpretation of sequence variants: a joint consensus recommendation of the American College of Medical Genetics and Genomics and the Association for Molecular Pathology. *Genet Med.* 2015;17(5):405-423. doi:10.1038/gim.2015.30
16. Pozzilli V, Giona F, Ceccanti M, et al. A case of motor neuron involvement in Gaucher disease. *Molecular Genetics and Metabolism Reports.* 2019;21:100540.  
doi:10.1016/j.ymgmr.2019.100540
17. Oliveira LM, Rastin T, Nimmo GAM, et al. Occurrence of Amyotrophic Lateral Sclerosis in Type 1 Gaucher Disease. *Neurol Genet.* 2021;7(4):e600.  
doi:10.1212/NXG.0000000000000600
18. Canosa A, Moglia C, Manera U, et al. Metabolic brain changes across different levels of cognitive impairment in ALS: a <sup>18</sup>F-FDG-PET study. *J Neurol Neurosurg Psychiatry.* Published online November 23, 2020;jnnp-2020-323876. doi:10.1136/jnnp-2020-323876
19. Diehl-Schmid J, Grimmer T, Drzezga A, et al. Decline of cerebral glucose metabolism in frontotemporal dementia: a longitudinal 18F-FDG-PET-study. *Neurobiology of Aging.* 2007;28(1):42-50. doi:10.1016/j.neurobiolaging.2005.11.002
